# Supplementary material for: p-type Mesoscopic Nickel Oxide/Organometallic Perovskite Heterojunction Solar Cells
Source: PubMed Central journal article supplement — Sci Rep. 2014 Apr 23;4:4756. doi: 10.1038/srep04756 (PMC3996464; doi:10.1038/srep04756), 2014-04-23
Supplement: srep04756-s1.pdf [file srep04756-s1.pdf]

## Supplement information

### p-type Mesoscopic Nickel Oxide/Organometallic Perovskite Heterojunction Solar Cells

Kuo-Chin Wang<sup>a</sup>, Jun-Yuan Jeng<sup>a</sup>, Po-Shen, Shen<sup>a</sup>, Yu-Cheng Chang<sup>b</sup>, Eric Wei-Guang Diao<sup>b</sup>, Cheng-Hung Tsai<sup>a</sup>, Tzu-Yang Chao<sup>a</sup>, Hsu-Cheng Hsu<sup>a</sup>, Pei-Ying Lin<sup>a</sup>, Peter Chen<sup>a,c,d\*</sup>, Tzung-Fang Guo<sup>a,c,d\*</sup>, Ten-Chin Wen<sup>c</sup>

- a) Department of Photonics,  
National Cheng Kung University, Tainan, Taiwan 701
- b) Department of Applied Chemistry and Institute of Molecular Science,  
National Chiao Tung University, Hsinchu, Taiwan 300
- c) Advanced Optoelectronic Technology Center (AOTC)
- d) Research Center for Energy Technology and Strategy (RCETS)
- e) Department of Chemical Engineering  
National Cheng Kung University, Tainan, Taiwan 701

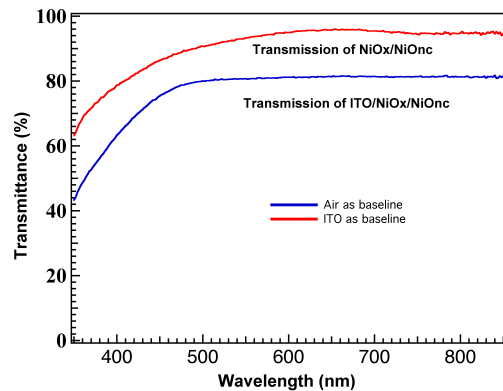

Figure S1. The transmittance of NiO<sub>x</sub>/NiO<sub>nc</sub> (with ITO as baseline) and ITO/ NiO<sub>x</sub>/NiO<sub>nc</sub> (with air as baseline).

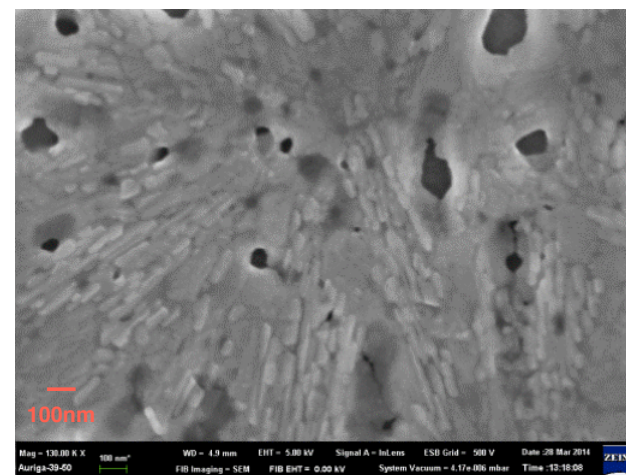

Figure S2. Top view SEM images of the perovskite deposited (spin with 9500 rpm) on NiO<sub>x</sub> thin film.

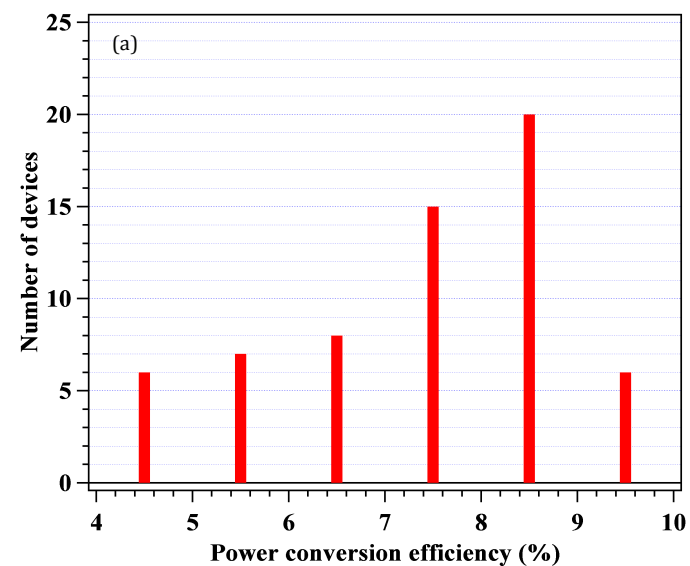

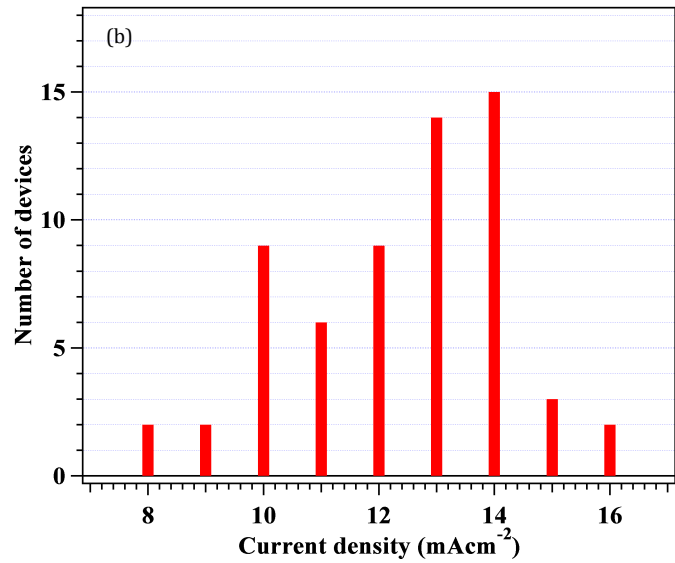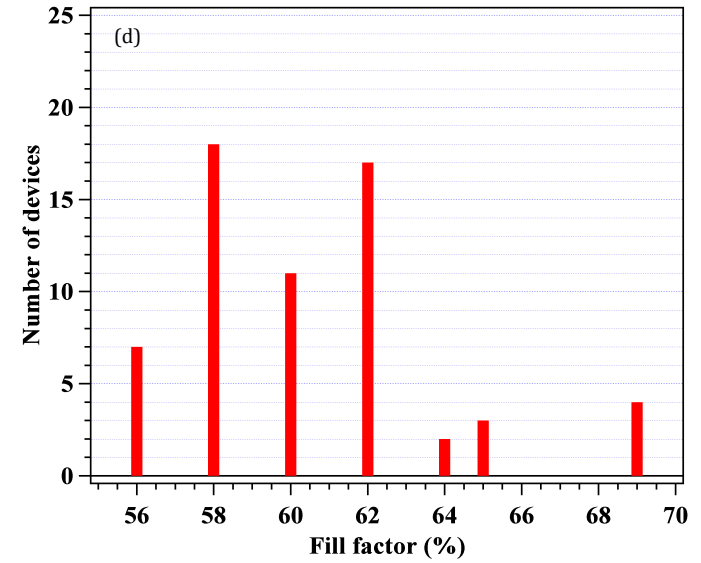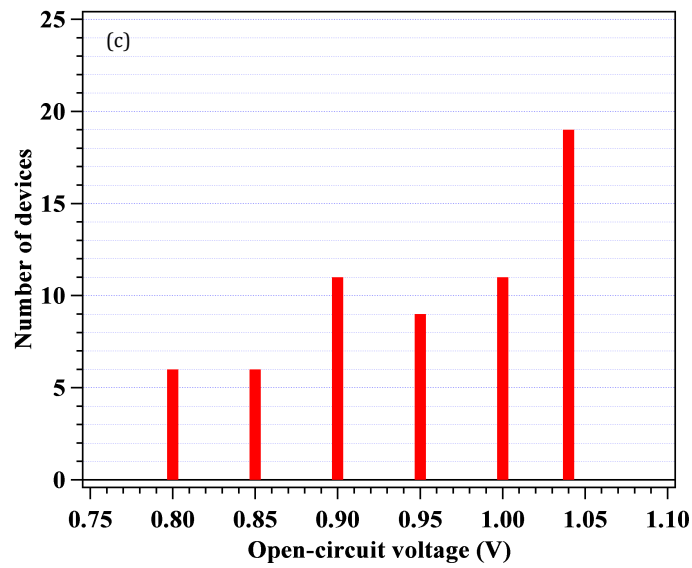

Figure S3. The statistics histogram on the photovoltaic parameters (a) efficiency (b)  $J_{sc}$  (c)  $V_{oc}$  (d) FF for the 62 mesoscopic NiOnc/perovskite devices. In the efficiency plot, the statistic summarized the number of devices between the interval of  $n$  and  $n+1$ . (For example, number of devices with efficiency between 9 and 10 is 6 and between 8 and 9 is 20). For the other parameters such as  $J_{sc}$ ,  $V_{oc}$ , and FF, the statistic summarized the number of devices between the intervals labeled on x-axis.
